# 1 Ion Identity Molecular Networking in the GNPS Environment

2 Robin Schmid<sup>1#</sup>, Daniel Petras<sup>2,3#</sup>, Louis-Félix Nothias<sup>2#</sup>, Mingxun Wang<sup>2</sup>, Allegra T. Aron<sup>2</sup>,  
3 Annika Jagels<sup>4</sup>, Hiroshi Tsugawa<sup>5,6</sup>, Johannes Rainer<sup>7</sup>, Mar Garcia-Aloy<sup>7</sup>, Kai Dührkop<sup>8</sup>, Ansgar  
4 Korf<sup>1</sup>, Tomáš Pluskal<sup>9</sup>, Zdeněk Kameník<sup>10</sup>, Alan K. Jarmusch<sup>2</sup>, Andrés Mauricio Caraballo-  
5 Rodríguez<sup>2</sup>, Kelly Weldon<sup>2</sup>, Melissa Nothias-Esposito<sup>2</sup>, Alexander A. Aksenov<sup>2,11</sup>, Anelize  
6 Bauermeister<sup>2,12</sup>, Andrea Albarracin Orío<sup>13</sup>, Carlismari O. Grundmann<sup>2,14</sup>, Fernando Vargas<sup>2</sup>,  
7 Irina Koester<sup>3</sup>, Julia M. Gauglitz<sup>2</sup>, Emily C. Gentry<sup>2</sup>, Yannick Hövelmann<sup>4</sup>, Svetlana A. Kalinina<sup>4</sup>,  
8 Matthew A. Pendergraft<sup>3</sup>, Morgan W. Panitchpakdi<sup>2</sup>, Richard Tehan<sup>15</sup>, Audrey Le Gouellec<sup>16</sup>,  
9 Gajender Aleti<sup>17</sup>, Helena Mannocho Russo<sup>2,18</sup>, Birgit Arndt<sup>4</sup>, Florian Hübner<sup>4</sup>, Heiko Hayen<sup>1</sup>, Hui  
10 Zhi<sup>19</sup>, Manuela Raffatellu<sup>19,20</sup>, Kimberly A. Prather<sup>3</sup>, Lihini I. Aluwihare<sup>3</sup>, Sebastian Böcker<sup>8</sup>, Kerry  
11 L. McPhail<sup>15</sup>, Hans-Ulrich Humpf<sup>4</sup>, Uwe Karst<sup>1</sup>, Pieter C. Dorrestein<sup>2,11\*</sup>

12

- 13 1. Institute of Inorganic and Analytical Chemistry, University of Münster, Münster, Germany
- 14 2. Skaggs School of Pharmacy and Pharmaceutical Sciences, University of California San Diego,  
15 La Jolla, San Diego, CA, USA
- 16 3. Scripps Institution of Oceanography, University of California San Diego, La Jolla, CA, US
- 17 4. Institute of Food Chemistry, University of Münster, Münster, Germany
- 18 5. RIKEN Center for Sustainable Resource Science, Yokohama, Kanagawa, Japan
- 19 6. RIKEN Center for Integrative Medical Sciences, Yokohama, Kanagawa, Japan
- 20 7. Institute for Biomedicine, Eurac Research, Affiliated Institute of the University of Lübeck,  
21 Bolzano, Italy
- 22 8. Chair for Bioinformatics, Friedrich-Schiller-University, Jena, Germany
- 23 9. Institute of Organic Chemistry and Biochemistry, Czech Academy of Sciences, Prague, Czech  
24 Republic
- 25 10. Institute of Microbiology, Czech Academy of Sciences, Prague, Czech Republic
- 26 11. Collaborative Mass Spectrometry Innovation Center, University of California San Diego, La  
27 Jolla, San Diego, CA, USA
- 28 12. Institute of Biomedical Sciences, Universidade de São Paulo, São Paulo, SP, Brazil
- 29 13. IRNASUS, Universidad Católica de Córdoba, CONICET, Facultad de Ciencias Agropecuarias.  
30 Córdoba, Argentina
- 31 14. School of Pharmaceutical Sciences of Ribeirão Preto, Universidade de São Paulo, Ribeirão  
32 Preto, SP, Brazil
- 33 15. Department of Pharmaceutical Sciences, College of Pharmacy, Oregon State University,  
34 Corvallis, OR, USA
- 35 16. Univ. Grenoble Alpes, CNRS, Grenoble INP, CHU Grenoble Alpes, TIMC-IMAG, Grenoble,  
36 France
- 37 17. Department of Psychiatry, University of California San Diego, San Diego, CA, USA
- 38 18. NuBBE, Institute of Chemistry, São Paulo State University (UNESP), Araraquara, SP, Brazil

39 19. Division of Host-Microbe Systems & Therapeutics, Department of Pediatrics, University of  
40 California San Diego, La Jolla, CA, USA

41 20. Chiba University-UC San Diego Center for Mucosal Immunology, Allergy and Vaccines (CU-  
42 UCSD cMAV), La Jolla, CA, USA

43

44 \*Correspondence should be addressed to [pdorrestein@ucsd.edu](mailto:pdorrestein@ucsd.edu)

45 # These authors contributed equally

46

#### 47 **Author contributions.**

##### 48 **General conceptualization**

49 RS, DP, LFN, MW, PCD conceptualized the idea of IIMN and its integration into GNPS and  
50 feature-finding software tools

51 RS, DP, LFN, PCD wrote the manuscript

52 RS, BA, FH, HUH conceptualized the MZmine feature grouping workflow

53 UK, HH provided discussion and feedback on IIMN and the MZmine workflow

##### 54 **Development**

55 RS developed the IIMN modules in MZmine and the MS<sup>2</sup> spectral library generation modules

56 MW, RS developed the “supplementary edges” format in the FBMN workflow to enable IIMN

57 MW programmed the IIMN workflow on GNPS

58 RS, MW developed the direct submission of MZmine data to run IIMN on GNPS

59 JR, MGA developed the XCMS/CAMERA IIMN integration in R

60 HT developed the MS-DIAL FBMN and IIMN integration

61 KD developed the MS<sup>2</sup> spectral merge function into the export modules for FBMN, IIMN, and

62 SIRIUS, which was coordinated by SB

63 TP, AK provided feedback and help for the development and integration of IIMN in MZmine

##### 64 **Experiments, data analysis, validation**

65 DP, LFN, AA, AAO, GA, AB, ATA, AMCR, JMG, ECG, COG, YH, ANJ, AKJ, SK, ZK, IK, ALG, KLM, MNE,

66 MAP, MWP, RT, FV, KW performed experiments, analyzed data with the MZmine IIMN

67 workflow, made data publicly available through MassIVE, and validated the results.

68 KAP, MR, HZ, HUH, PCD provided data and resources

69 RS, DP, ATA, ANJ analyzed data

70 ATA, RS, ANJ wrote supplemental use cases

71 YH, SK, ANJ, AK, BA, ZK tested and provided feedback on the MZmine workflow

##### 72 **Documentation and videos**

73 LFN, HMR, AB, DP, MW, ATA, RS, MNE created the IIMN and FBMN documentations

74 RS produced video tutorials on FBMN, IIMN, and MZmine

75 MW, RS produced videos on FBMN and the direct submission of MZmine results to GNPS

76 DP, MW produced a video tutorial for feature finding with MZmine and FBMN in GNPS

77 All authors contributed to the final manuscript.

78 **Abstract (currently 68 and can be 70):**

79 Molecular networking connects tandem mass spectra of molecules based on the similarity  
80 of their fragmentation patterns. However, during ionization, molecules commonly form multiple  
81 ion species with different fragmentation behavior. To connect ion species of the same molecule,  
82 we developed Ion Identity Molecular Networking. These new relationships improve network  
83 connectivity, are shown to reveal novel ion-ligand complexes, enhance annotation within  
84 molecular networks, and facilitate the expansion of spectral libraries.

85 **Main (1000-1500; currently 1691):**

86 Molecular networking (MN)<sup>1</sup> within the GNPS web platform (<http://gnps.ucsd.edu>)<sup>2</sup> has  
87 been used for the analysis of non-targeted mass spectrometry data in various fields<sup>3,4</sup>. MN relies  
88 on the principle that similar structures tend to form similar patterns in tandem mass spectra  
89 (MS<sup>2</sup>). By computing pairwise spectral comparisons in a dataset, we create an MS<sup>2</sup> spectral  
90 network. This network is enriched by annotating the MS<sup>2</sup> spectra against MS<sup>2</sup> spectral libraries  
91 or compound databases (Figure 1); further, annotations can be propagated through the  
92 network<sup>5</sup>. MN can be used to map the chemical space of complex samples to facilitate the  
93 discovery of new molecules, especially analogs of known compounds<sup>2</sup>. For the data analysis of  
94 liquid chromatography-mass spectrometry (LC-MS<sup>2</sup>) data, feature-based molecular networking  
95 (FBMN) combines MN with chromatographic feature finding tools<sup>6</sup>. During LC-MS ionization, a  
96 given compound can generate multiple ion adducts (*e.g.*, protonated and sodiated), which  
97 appear as individual nodes in a molecular network, due to different precursor mass-to-charge  
98 ratios (*m/z*). As various commonly detected ion adducts exhibit different fragmentation behavior  
99 during collision-induced dissociation (CID) (Supplementary Figure 1), MS<sup>2</sup> spectral networking on  
100 its own might not connect any ion adducts of the same compound. Here, we present ion identity  
101 molecular networking (IIMN), a workflow that annotates and connects related ion species in  
102 feature-based molecular networks within the GNPS web platform.

103 Multiple tools have been developed for the connection of ion species in LC-MS data,  
104 which typically compare retention time, chromatographic shape, and feature intensity across  
105 samples to group LC-MS features of the same compound<sup>7-11</sup>. Subsequently, ion species can be  
106 identified based on known mass differences<sup>7</sup>, resulting in MS<sup>1</sup>-based ion identity networks (IIN).  
107 We fully integrated IIN into MS<sup>2</sup>-based molecular networks in the GNPS environment. After  
108 feature grouping and identification of ion species, extracted data are uploaded to GNPS to run  
109 IIMN on the webserver. Resulting ion identity molecular networks contain two layers of feature  
110 (node) connectivity, linking ion identities of the same compound by MS<sup>1</sup> characteristics and  
111 structurally similar compounds by MS<sup>2</sup> spectral similarity (Figure 1). The IIMN modules in MZmine  
112 (Supplementary Figure 2) include new feature grouping and ion identity networking algorithms,  
113 as well as modules to visualize and analyze networking results.

114 To validate the identification of ion species with IIMN, we created an LC-MS<sup>2</sup> benchmark  
115 dataset of a natural product mixture containing 300 compounds, in which we promoted adduct  
116 formation by post-column infusion of ammonium acetate or sodium acetate at different  
117 concentrations (Figure 2a-e). The IIMN networks can be depicted in alternative layouts that  
118 illustrate complementary results within the same dataset. It is also possible to collapse ion  
119 identity networks to reduce the redundancy of different ion species by merging them into a single  
120 “neutral molecule” (M) node (Figure 2c). In this dataset, IIN successfully connects ion identities  
121 and reduces the size of a complex network by 56% to four major compounds. The increased  
122 connectivity facilitates the propagation of structure annotations to neighboring in-source  
123 fragments and an unannotated compound. Finally, the abundance change of identified adducts  
124 ([M+H]<sup>+</sup>, [M+NH<sub>4</sub>]<sup>+</sup>, [M+Na]<sup>+</sup>) in our benchmark dataset is in agreement with the different post-  
125 column salt infusion conditions (H<sub>2</sub>O, NaAcetate or NH<sub>4</sub>Acetate, Figure 2f) which validates ion  
126 species identification on a dataset level.

127 To test the workflow with data generated from various sample types and on different  
128 experimental platforms, 24 public datasets were processed by different authors using the  
129 MZmine workflow (Figure 2g, Supplementary Table 1). Here, the application of IIMN to identify  
130 post-column induced ion species can be particularly useful for the screening of biologically-  
131 relevant metal-binding compounds. In a native ESI-based metabolomics study, IIMN specifically  
132 revealed that the known siderophore yersiniabactin also acts as a zincophore (Supplementary  
133 Figure 3)<sup>12</sup>. In a dataset with 88 animal bile acid extracts, multiple smaller networks and  
134 unconnected nodes were combined to a large network of free bile acids and those conjugated to  
135 amino acids or sulfate, resulting in higher connectivity in the network (Supplementary Figure 4).  
136 IIMN also yielded additional structural information in the case of mold samples from *Stachybotrys*  
137 *chartarum* (Supplementary Figure 5). The increasing number of aliphatic hydroxyl groups in  
138 phenylspirodrimane derivatives was reflected by the maximum number of in-source water  
139 losses, whereas acetylation of hydroxy groups reduced this number. During the creation of IIMN  
140 networks, further layers of additional feature connections can be supplied. One example is a  
141 relationship between ion identity networks based on neutral mass differences that annotate  
142 putative structure modifications between compounds (Supplementary Figure 6). From a global  
143 view on all 24 datasets, IIMN successfully reduced the number of unconnected LC-MS<sup>2</sup> features  
144 and increased the connections to annotated compound structures (Supplementary Figure 7,  
145 Supplementary Table 2).

146 In positive ion mode, most mass spectrometrists routinely consider H and Na adducts, but  
147 rarely NH<sub>4</sub>, Ca, and K adducts and in-source fragments that were commonly observed in the 24  
148 datasets. Inspecting the relative distribution of ion identities within all datasets, marine samples,  
149 for instance, showed a higher percentage of NH<sub>4</sub> adducts (24±5%) when compared to all other  
150 datasets (10±8%). Sodium adducts that were expected to be elevated in marine samples (due to  
151 anticipated higher salt contents in the original sample), in contrast, are evenly distributed  
152 between all datasets with an average of 26±6% (Figure 2g). On average, protonated species  
153 contribute to 23±6% of the overall ion identities, indicating spectral bias in public MS<sup>2</sup> libraries

154 such as MassBank of North America (66% [M+H]<sup>+</sup>) and GNPS (65% [M+H]<sup>+</sup>) (Supplementary Figure  
155 8), and suggests that the community should provide MS<sup>2</sup> spectra for other ion species of the same  
156 molecules to reference libraries. Here, IIMN can be used to expand the spectral libraries with  
157 additional adducts and in-source fragments in LC-MS experiments, which can significantly  
158 increase spectral library coverage and thus MS<sup>2</sup> annotation rates. By propagating high confident  
159 spectral matches (cosine > 0.9 or authentic standards) to connected ion identities from the 24  
160 public datasets and two datasets of natural products from the NIH 'ACONN' collection, we  
161 created spectral libraries with a total of 2,659 unique entries with a broader and more  
162 representative ion species coverage (e.g., 24% [M+H]<sup>+</sup>, 22% multimeric species, 17% [M+Na]<sup>+</sup>,  
163 15% in-source fragments, and 13% [M+NH<sub>4</sub>]<sup>+</sup>). Such spectral libraries better represent ion species  
164 observed in typical metabolomics experiments (Supplementary Table 3 and Supplementary  
165 Figure 8).

166 In conclusion, by establishing relationships between different ion species originating from  
167 the same compound, IIMN facilitates molecular network interpretation and compound  
168 annotation. An exciting application of IIMN is the expansion of spectral libraries by (re)-  
169 processing public datasets and propagating spectral library annotations to create library entries  
170 of connected ion identities. The identification of ion adducts can reveal novel ionophores, some  
171 of which will be biologically relevant and are still underappreciated in the function of small  
172 molecules<sup>12,13</sup>. The integration into FBMN and the GNPS environment provided a platform to  
173 utilize IIMN in other related bioinformatics tools, e.g., SIRIUS<sup>14</sup> and CANOPUS<sup>15</sup>. We anticipate  
174 that the new option to add orthogonal relationships between features to IIMN will stimulate the  
175 integration and development of additional tools for spectral alignment and measures of feature-  
176 feature relationships<sup>16</sup>.

177 To reach a broad user base, we interfaced the IIMN workflow with three widely used open  
178 source MS processing tools (MZmine<sup>17</sup>, MS-DIAL<sup>18</sup>, and XCMS<sup>7,19</sup>). Detailed documentation and  
179 training videos are available online (<https://ccms-ucsd.github.io/GNPSDocumentation/fbmniin/>). Especially the option to directly submit IIMN analysis from MZmine to GNPS provides a  
180 simple entry point for new users.  
181

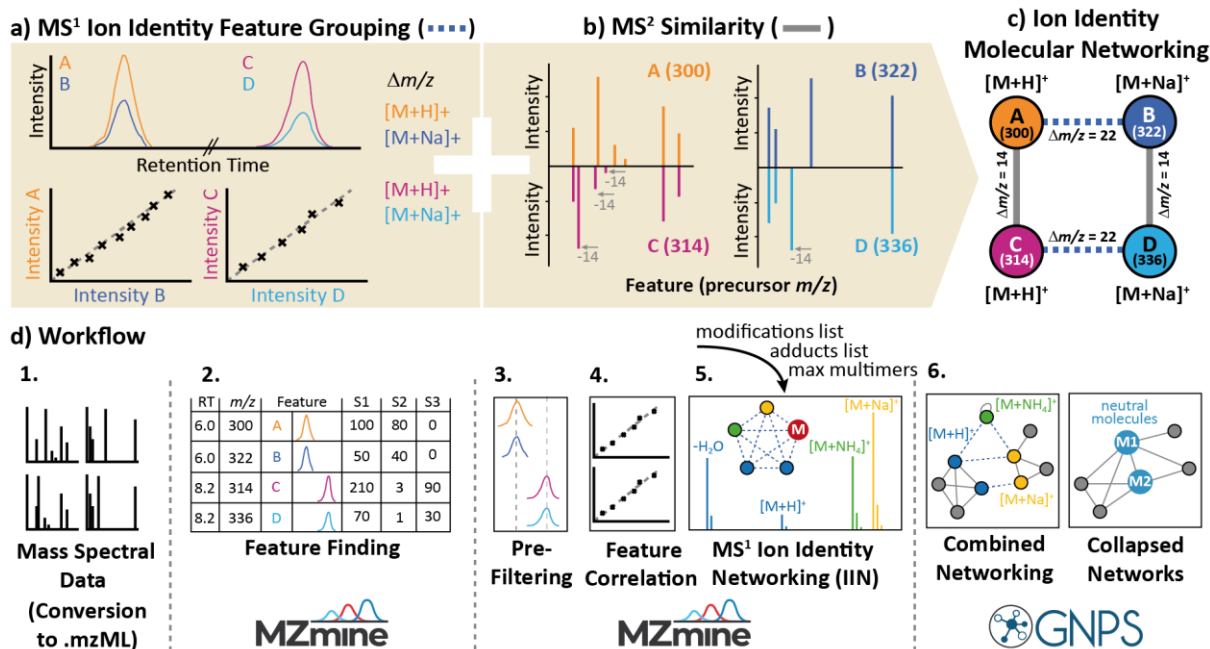

182

183 **Figure 1: The concept of ion identity molecular networking (IIMN).** a) shows the two main  
 184 principles of the combined networks. IIN identifies and connects different ion species of the same  
 185 compound based on MS<sup>1</sup> characteristics, while FBMN connects LC-MS feature nodes by their MS<sup>2</sup>  
 186 fragmentation spectral similarity. b) highlights the data processing workflow to create combined  
 187 IIMN networks in MZmine and GNPS. After feature detection and alignment across multiple  
 188 samples, features are grouped based on the correlation of their chromatographic peak shapes  
 189 and other MS<sup>1</sup> characteristics. Subsequently, ion species of grouped features are identified with  
 190 an ion identity library, which is generated based on user input for included adducts, in-source  
 191 modifications, and a maximum multimers parameter. After uploading these results to GNPS,  
 192 combined ion identity molecular networks are created on the webserver. Optionally, ion identity  
 193 networks can be collapsed into single molecular nodes to reduce complexity and redundancy.



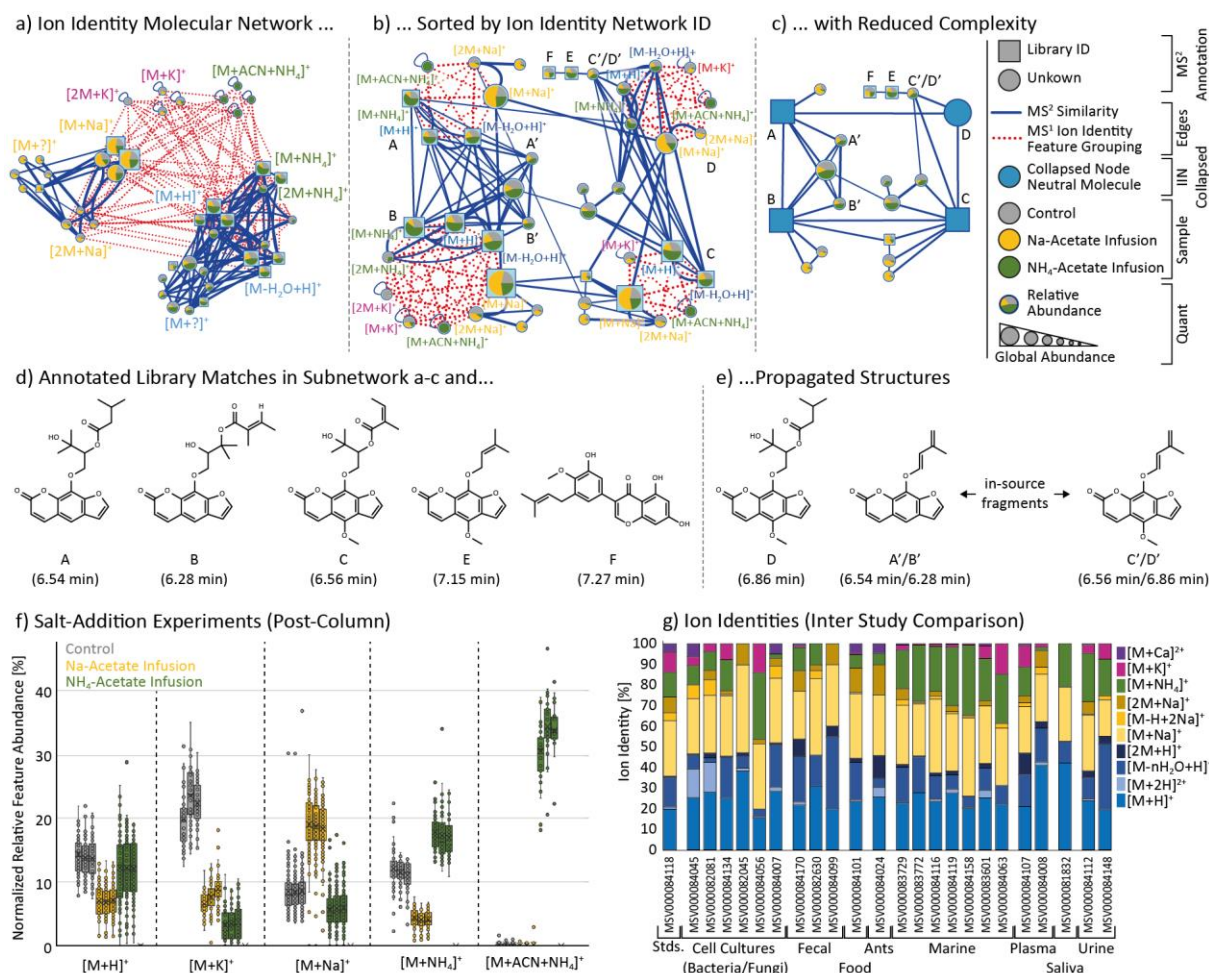

194

195 **Figure 2: Ion identity molecular networking and statistical results.** Depicted are three  
 196 visualizations of the same ion identity molecular network from the post-column salt infusion  
 197 experiments. **a)** Sorting by ion identities reveals that MS<sup>2</sup> similarity edges often link sodiated ions  
 198 ([M+Na]<sup>+</sup> and [2M+Na]<sup>+</sup>) into a subnetwork that is separated from a subnetwork of ammonium  
 199 adducts with protonated species. The pie-charts indicate relative abundances in different salt  
 200 addition experiments (Control (H<sub>2</sub>O), grey; Na-Acetate, yellow, NH<sub>4</sub>-Acetate, green). The  
 201 complexity and redundancy are reduced by **b)** sorting all ions of the same molecule in a circular  
 202 layout and **c)** collapsing all IINs into single molecular nodes. This option reduces the complexity  
 203 of this IIMN from 43 feature nodes to four molecular nodes (A-D) and 15 feature nodes (-56%).  
 204 **d)** lists the structure of all GNPS library matches and **e)** propagated structures for D (based on A  
 205 and C) and the in-source fragments A' to D'. This subset of structurally related compounds gives  
 206 a first statistical proof for high correct annotation rates during IIN in MZmine as adduct formation  
 207 responds to the corresponding salt infusion, e.g., higher [M+Na]<sup>+</sup> abundances in the sodium  
 208 acetate buffer infusion. Moreover, this is also true on **f)** a dataset scale where the relative  
 209 intensities of selected ion identities are plotted for each post-column infusion in triplicate. This  
 210 plot reveals that the in-source cluster [M+ACN+NH<sub>4</sub>]<sup>+</sup> exclusively forms in the ammonium acetate  
 211 buffer infusion. **g)** IIMN results for 24 experimental datasets, showing the relative ion formation  
 212 tendencies measured as the number of ion identities.

## 213 Online Methods

### 214 Post-column salt infusion experiments

215 For salt addition UHPLC-MS<sup>2</sup> experiments, a mixture of 300 natural products from the NIH  
216 NCGC collection was prepared in 100  $\mu$ L methanol/water/formic acid (80:19:1, Fisher Scientific,  
217 San Diego, USA) at a concentration of 0.01  $\mu$ M of which 2  $\mu$ L were injected into a Vanquish UHPLC  
218 system coupled to a Q-Exactive quadrupole orbitrap mass spectrometer (Thermo Fisher  
219 Scientific, Bremen, Germany) in three technical replicates. For the chromatographic separation,  
220 a reversed-phase C18 porous core-shell column (Kinetex C18, 50 x 2 mm, 1.8  $\mu$ m particle size,  
221 100  $\text{\AA}$  pore size, Phenomenex, Torrance, USA) was used. For gradient elution, a Vanquish (Thermo  
222 Fisher Scientific, Bremen, Germany) high-pressure binary gradient system was used. The mobile  
223 phase consisted of solvent A H<sub>2</sub>O + 0.1% formic acid (FA) and solvent B acetonitrile (ACN) + 0.1%  
224 FA. The flow rate was set to 0.5 mL/min. Samples were eluted with a linear gradient from 0-  
225 0.5 min, 5% B, 0.5-8 min 5-50% B, 8-10 min 50-99% B, followed by a 2 min washout phase at 99%  
226 B and a 3 min re-equilibration phase at 5% B. Post-column we infused ammonium acetate or  
227 sodium acetate solutions (50, 5 and 0 mg/L) at 10  $\mu$ L/min (dilution factor 50) with a syringe pump  
228 to yield final concentration of sodium or ammonium acetate of 1, 0.1 and 0 mg/L. Data-  
229 dependent acquisition (DDA) of MS<sup>2</sup> spectra was performed in positive mode. Electrospray  
230 ionization (ESI) parameters were set to 52 psi sheath gas pressure, 14 AU auxiliary gas flow, 0 AU  
231 sweep gas flow and 400 °C auxiliary gas temperature. The spray voltage was set to 3.5 kV and the  
232 inlet capillary to 320 °C. 50 V S-lens level was applied. MS scan range was set to  $m/z$  150-1500  
233 with a resolution at  $m/z$  200 of 17,500 with one micro-scan. The maximum ion injection time was  
234 set to 100 ms with an automatic gain control (AGC) target of 1E6. Up to 5 MS<sup>2</sup> spectra per MS<sup>1</sup>  
235 survey scan were recorded in DDA mode with a resolution of 17,500 at  $m/z$  200 with one micro-  
236 scan. The maximum ion injection time for MS<sup>2</sup> scans was set to 100 ms with an AGC target of  
237 3.0E5 ions and a minimum 5% C-trap filling. The MS<sup>2</sup> precursor isolation window was set to  $m/z$   
238 1. The normalized collision energy was set to a stepwise increase from 20 to 30 to 40% with single  
239 charge as the default charge state. MS<sup>2</sup> scans were triggered at the apex of chromatographic  
240 peaks within 2 to 15 s from their first occurrence. Dynamic precursor exclusion was set to 5 s.  
241 Ions with unassigned charge states were excluded from MS<sup>2</sup> acquisition as well as isotope peaks.

### 242 Ion identity molecular networking – workflow overview

243 The ion identity molecular networking (IIMN) workflow aids the feature-based molecular  
244 networking workflow by adding MS<sup>1</sup> specific information, which is provided as new columns in  
245 the quantification table and as additional edges in a “Supplementary Pairs” text file within the  
246 GNPS-FBMN workflow. This parameter was introduced to stimulate and facilitate the  
247 development of new computational methods that link nodes in the resulting molecular networks  
248 and was initially developed for IIMN. The text format follows a generic comma-separated style



249 with the columns ID1 and ID2 (matching the feature IDs in the feature quantification table and  
250 mgf), EdgeType (defining the method), Score (numerical), and Annotation. To enable a broad user  
251 base to employ ion identity molecular networking in their studies, three popular mass  
252 spectrometry processing tools, namely, MZmine, MS-DIAL, and XCMS (+CAMERA), were modified  
253 with additional export scripts or modules.

#### 254 **The general steps to create ion identity molecular networks:**

- 255 1. If needed, convert the spectral data files to an open format (e.g., mzML)
- 256 2. Import the data into one of the open-source tools: MZmine, MS-DIAL, or XCMS
- 257 3. Process the data to create a feature list (aligned over all samples)
- 258 4. Perform MS<sup>1</sup>-based feature grouping and ion identity annotation
- 259 5. Export the feature list as a feature quantification table (.csv), an MS<sup>2</sup> spectral summary  
260 file (.mgf) which contains a representative fragmentation spectrum for each feature,  
261 and supplementary edges files (IIN files, .csv) (more information in the tool-specific  
262 workflow sections)
- 263 6. Create a metadata file to group samples for statistics (optional)
- 264 7. Upload all files to GNPS and start a new feature-based molecular networking job  
265 (MZmine can directly submit and start a new IIMN job on GNPS)
- 266 8. Download and visualize the results in a network analysis software (e.g., Cytoscape<sup>20</sup>,  
267 <https://cytoscape.org/>).
- 268

269 Refer to the documentation on how to run FBMN within GNPS and multiple mass spectrometry  
270 data processing tools.

271 <https://ccms-ucsd.github.io/GNPSDocumentation/featurebasedmolecularnetworking/>

272 For IIMN, refer to the related part of the GNPS documentation.

273 <https://ccms-ucsd.github.io/GNPSDocumentation/fbmniin/>

#### 274 **IIMN with MZmine**

275 MZmine lacked a functional algorithm to group and annotate different ion species of the  
276 same molecules. Therefore, a novel workflow was implemented and split into separate modules  
277 for feature grouping (metaCorrelate), annotation of the most common ions (ion identity  
278 networking), an option to add more ion identities to existing IINs iteratively, and modules to  
279 validate multimers and in-source fragments based on MS<sup>2</sup> scans. Both the creation and expansion  
280 of ion identity networks follow customizable lists of adducts and in-source modifications to cover  
281 any type of multimers, in-source fragments, and adducts. Finally, the GNPS-FBMN export module  
282 was modified to export all needed files to run IIMN. The quant table (.csv) contains grouping and  
283 ion identity specific columns, and a new “Supplementary Pairs” text file lists all additional IIN  
284 edges. MZmine is the first tool to provide a direct submission to GNPS to start analysis jobs,

285 consequently streamlining the workflow and lowering the entrancing energy needed to apply  
286 IIMN within GNPS.

287 In detail, the metaCorrelate feature grouping algorithm searches for features with similar  
288 average retention times, chromatographic intensity profiles (feature shapes) with a minimum  
289 percentage of intra-sample correlation and overlap, and minimum feature intensity correlations  
290 across all samples (Supplementary Figure 2). The feature shape correlation is a vital filter to  
291 reduce false grouping significantly and can apply either a minimum Pearson correlation (favored)  
292 or cosine similarity. A requirement is at least five data points, two on each side of the peak apex.  
293 If a low MS<sup>1</sup> scan rate leads to chromatographic peaks with less than five data points, it is  
294 advisable to either redesign the acquisition method or to turn off the feature shape correlation.  
295 Note that the latter is expected to reduce the ion annotation consistency and should be used  
296 with caution. Similarly, the feature height correlation across all samples is optional, provides the  
297 same correlation or similarity measures, and additionally, relies on constant ionization conditions  
298 for all samples. Therefore, this filter should be turned off if the conditions were changed  
299 throughout the study, e.g., by changing the separation conditions or ion source parameters. The  
300 general principle of the feature height correlation is that different ions of the same molecule  
301 should follow a similar trend in abundance across all samples of the same study. If any feature,  
302 such as an [M+H]<sup>+</sup> feature, increases at least 10-fold, all grouped features, e.g., [M+Na]<sup>+</sup> or  
303 [M+NH<sub>4</sub>]<sup>+</sup>, should never have a negative feature height correlation coefficient and should as well  
304 increase in abundance. If both the feature shape and feature height correlation filters are  
305 omitted, feature grouping is solely filtered by the retention time window and overlap. To  
306 annotate features on an MS<sup>1</sup> level, ion identity libraries are created with a user-defined list of in-  
307 source modifications (fragments and clusters), a list of adducts, and a “maximum multimers  
308 number” parameters (Supplementary Figure 2). Each adduct is combined with each modification  
309 to fill the library with ion identities for 1M to the maximum multimers number. Ion identity  
310 networks are then created by applying all ion identity pairs to all pairs of grouped features to  
311 calculate and compare the neutral masses of features ( $m/z$ ) with specific ion identities (mass  
312 difference, charge ( $z$ ), and multimer number). Optionally, after the creation of ion identity  
313 networks with the main library, further ion identities can be added iteratively to existing  
314 networks. This workflow enables the user to divide into commonly and uncommonly detected  
315 ion identities and ensures that each network contains at least two or more main ion identities.  
316 Finally, an ion identity network refinement provides filters for minimum network size and to only  
317 keep the largest (most descriptive) IIN per feature.

318 More on the integration of the new IIMN workflow in MZmine can be found online  
319 ([http://mzmine.github.io/iin\\_fbmj](http://mzmine.github.io/iin_fbmj)).

320 Refer to the documentation and video tutorials on how to apply IIMN within MZmine and GNPS.  
321 The youtube playlist “MZmine: Ion Identity Molecular Networking” contains instructions on data  
322 processing for IIMN and FBMN, a minimalistic and full IIMN workflow within MZmine, and  
323 theoretical background to feature shape correlation and ion identity molecular networking.

324 <https://ccms-ucsd.github.io/GNPSDocumentation/fbmj-iin-mzmine/>

325 <https://www.youtube.com/playlist?list=PL4L2Xw5k8ITyxSyBdrcv70LDKsP8QNuyN>

## 326 **IIMN with XCMS (CAMERA)**

327 The XCMS<sup>19</sup> Bioconductor package<sup>21</sup> is the most widely used software for processing  
328 untargeted LC-MS based metabolomics data. Its results can be further processed with the  
329 CAMERA<sup>7</sup> package to determine which of the extracted *m/z*-rt features might be adducts<sup>7</sup> or  
330 isotopes<sup>22</sup> of the same original compound. For the integration of XCMS and CAMERA into the  
331 IIMN workflow, novel utility functions were created (`getFeatureAnnotations` and `getEdgelist`)  
332 to extract and export MS<sup>1</sup> based feature and edge annotations (i.e. grouping of features to  
333 adduct/isotope groups of the same compound). In addition, the utility function  
334 `formatSpectraForGNPS` is used to export MS<sup>2</sup> spectra. These functions are available in the  
335 GitHub repository <https://github.com/jorainer/xcms-gnps-tools>. R-markdown documents and  
336 python scripts with example analyses and descriptions are available in the documentation.  
337 (<https://ccms-ucsd.github.io/GNPSDocumentation/fbmn-iin-xcms/>) The files exported by these  
338 utility functions can be directly used for IIMN analysis on GNPS. Note that theoretically, it is  
339 possible to use RAMClust<sup>8</sup>, CliqueMS<sup>23</sup>, or other packages available for XCMS that perform ion  
340 annotation. The results of these packages need to be reformatted to the introduced generic  
341 supplementary edges format. The CAMERA integration might serve as a reference and starting  
342 point.

## 343 **IIMN with MS-DIAL**

344 MS-DIAL<sup>24</sup> is a polyvalent mass spectrometry data processing software capable of  
345 processing various non-targeted LC-MS metabolomics experiments, including ion mobility mass  
346 spectrometry (<http://prime.psc.riken.jp/compms/msdial/main.html>). MS-DIAL supports IIMN  
347 since version 4.1. After a standard data processing workflow with MS-DIAL, the “Alignment  
348 results” can be exported for IIMN analysis using the option “GNPS export”. Detailed  
349 documentation and representative tutorials are available in the GNPS documentations  
350 (<https://ccms-ucsd.github.io/GNPSDocumentation/fbmn-iin-msdial>).

## 351 **Dataset processing**

352 All 24 datasets (Supplementary Table 1) were processed with the MZmine workflow. As  
353 each dataset originates from a different study and was acquired with different LC-MS methods,  
354 variable feature detection and alignment parameters were applied, which are summarized in  
355 Supplementary Table 5. For all datasets, the same parameters were used for the feature grouping  
356 module (metaCorrelate) and the ion identity networking modules, with the only exception that  
357 the feature height correlation filter was turned off to group features for the post-column salt  
358 infusion experiments. As described previously, this filter should only be applied if the ionization

359 conditions and detection sensitivity are kept constant over all samples. The post-column infusion  
360 of different salt solutions for this study promotes the formation of specific ion species in the  
361 ionization source.

- 362 1. A pair of features were grouped with a retention time tolerance of 0.1 min, with a  
363 minimum overlapping intensity percentage of 50% in at least 2 samples in the whole  
364 dataset (gap-filled features excluded), a feature shape Pearson correlation greater  
365 equals 0.85 with at least 5 data points and 2 data points on each edge, and a feature  
366 height Pearson correlation greater equals 0.6 with at least 3 data points.
- 367 2. The initial creation of ion identity networks was performed using the ion identity  
368 networking module and a maximum tolerance of 0.001  $m/z$  or 10 ppm, a comparison  
369 where a pair of features and a pair of ion identities only need to match in one sample,  
370 and an ion identity library created based on 2M as the maximum multimers number, a  
371 list of adducts ( $[M+H]^+$ ,  $[M+Na]^+$ ,  $[M+NH_4]^+$ ,  $[M-H+2Na]^+$ ,  $[M+2H]^{2+}$ , and  $[M+H+Na]^{2+}$ ),  
372 and a list of in-source modifications ( $[M-H_2O]$  and  $[M-2H_2O]$ ).
- 373 3. Two iterations were applied to add more ion identities to the resulting networks of step  
374 2 with an unchanged  $m/z$  tolerance.
  - 375 a. To add a higher variety of adducts, a maximum multimers number of 2, a list of  
376 adducts ( $[M+H]^+$ ,  $[M+Na]^+$ ,  $[M+K]^+$ ,  $[M+NH_4]^+$ ,  $[M-H+2Na]^+$ ,  $[M-H+Ca]^+$ ,  $[M-$   
377  $H+Fe]^+$ ,  $[M+2H]^{2+}$ ,  $[M+H+Na]^{2+}$ ,  $[M+H+NH_4]^{2+}$ ,  $[M+Ca]^{2+}$ , and  $[M+Fe]^{2+}$ ), and an  
378 empty list of modifications were used.
  - 379 b. To add a greater variety of modifications and larger multimers, a maximum  
380 multimers number of 5, a list of adducts ( $[M+H]^+$ ,  $[M+NH_4]^+$ , and  $[M+2H]^{2+}$ ), and  
381 a list of modifications ( $[M-H_2O]$ ,  $[M-2H_2O]$ ,  $[M-3H_2O]$ ,  $[M-4H_2O]$ ,  $[M-HFA]$ , and  
382  $[M-ACN]$ ) were used.

383

## 384 Dataset statistics

385 Ion identity molecular networking statistics on all datasets were extracted with a new  
386 MZmine module and exported to a comma-separated file (csv) for evaluation in Microsoft Excel.  
387 The module is included in the special IIMN build of MZmine. All available statistics were based on  
388 the spectral input file (mgf) and the resulting network file (graphml), which was downloaded from  
389 the dataset's corresponding GNPS results page. The graphml file contains all ion identity  
390 molecular networking results, namely, the nodes representing individual features and the edges  
391 between nodes. The mgf spectral summary file contains the corresponding  $MS^2$  spectrum for  
392 each feature node. While classical MN and FBMN depend on  $MS^2$  data for each node, IIN creates  
393 new  $MS^1$ -based edges that might include nodes without an  $MS^2$  spectrum in the resulting  
394 network. For a comparison between FBMN and IIMN, only nodes present within both networks  
395 (with an  $MS^2$  spectrum) are considered. A statistical summary and in-depth statistics on each  
396 dataset are provided in a supplementary Microsoft Excel workbook (Supplementary File

397 SI\_IIMN\_dataset\_statistics.xlsx). Excerpts are summarized in Supplementary Table 2, and the  
398 different statistical measures and metadata items are described in Supplementary Table 4. One  
399 important measure is the identification density, i.e., all identified nodes and nodes with a  
400 maximum distance of n edges to at least one identified compound. Supplementary Figure 7  
401 highlights how the additional edges of ion identity networking increase the identification density  
402 in the datasets, measured over a maximum distance of 1 to 5 edges. The increased density over  
403 one edge reflects the new links between unidentified to an identified node by IIN edge. The  
404 identification density is increased for 21 datasets, two datasets with poor identification rates  
405 exhibit no change, and one dataset lacks identifications. The maximum identification density  
406 increases over one edge of +8% results in a total of 42% of the nodes being either identified or  
407 directly linked to an identified compound. The network of the corresponding dataset, i.e., the  
408 post-column salt infusion study, contains a total of 22% identified nodes and 25% nodes with ion  
409 identity and MS<sup>2</sup> spectrum in 134 ion identity networks. Ion identity molecular networking  
410 decreased the number of unconnected singleton nodes by -12% to a total of 42%. Filtering out  
411 nodes with poor MS<sup>2</sup> spectra with less than four signals, which was used as the minimum number  
412 of signals for the library matching and FBMN networking, decreases the number of unconnected  
413 singleton nodes further to 29%. Consequently, the network contains many nodes without a  
414 match to any library or experimental spectra. Collapsing all nodes with IIN edges into molecular  
415 nodes reduces the total network size by -20%, which significantly reduces the overall redundancy  
416 and facilitates network visualization and analysis.

417 To extract the same statistics on any results from IIMN, download the networking results  
418 as a graphml file from a GNPS job page and use the mgf file of that analysis. The special MZmine  
419 IIMN build offers two modules in the tab “Tools”. More information and the latest IIMN enabled  
420 MZmine version are available ([http://mzmine.github.io/iin\\_fbm](http://mzmine.github.io/iin_fbm)).

- 421 • GNPS results analysis (IIMN+FBMN)
  - 422 ○ For a single analysis
  - 423 ○ This tool also offers the extraction of new spectral library entries
- 424 • GNPS results analysis (IIMN+FBMN) of all sub
  - 425 ○ For multiple analyses at once
  - 426 ○ Generates statistics for each subfolder with exactly one graphml and mgf file
  - 427 (names do not have to match)

428



## 429 IIMN-based spectral library generation

### 430 From experimental datasets

431 To comprehensively cover the fragmentation behavior of a molecule, spectral libraries  
432 should contain fragmentation spectra of different ion species acquired with different instrument  
433 types and fragmentation methods. IIMN might serve as a solution to expanded spectral libraries.  
434 In order to create new spectral library entries based on IIMN, all 24 datasets were searched for  
435 ion identity networks that contain a match to the GNPS spectral libraries with a minimum cosine  
436 similarity of 0.9 and a minimum number of shared fragment ions of 4-6, depending on each  
437 dataset's FBMN parameters. For each matching IIN, all contained ion identity features with an  
438 MS<sup>2</sup> spectrum and at least 3 signals above 0.1% relative intensity were extracted as new library  
439 spectra. The new library entries were constructed based on the highest library match and its  
440 attributes, namely, the compound name, structure strings as SMILES and InChI, and the neutral  
441 mass, the ion identity provided the ion species information and the precursor *m/z*, and dataset-  
442 specific metadata was added manually. With these strict rules, a total of 538 spectral entries  
443 were extracted from all 24 datasets. The new library has a broader and more distributed ion  
444 identity coverage when compared to selected representative spectral libraries from MassBank of  
445 North America (MoNA) and GNPS. At the same time, it is similar to spectral libraries that were  
446 generated with the new MSMS-Chooser library creation workflow in the GNPS ecosystem  
447 (Supplementary Fig. 5). The new IIMN-based library was made publicly available through the  
448 GNPS library batch submission (Supplementary Tab. 3).

### 449 From a natural product compound library

450 The library creation workflow was repeated and refined on the mass spectrometry data  
451 collected for the "NIH NPAC ACONN" collection of natural products (2,179 compounds) provided  
452 by Ajit Jadhav (NIH, NCATS). The IIMN workflow was optimized and then applied to two LC-MS  
453 datasets collected on mass spectrometers operating in positive ionization mode, the  
454 MSV000080492 acquired on a qTOF-MS maXis II (Bruker Daltonics, GmbH) and the  
455 MSV000083472 acquired on a Q-Exactive (ThermoFisher Scientific, MA). During feature-based  
456 molecular networking, library matching was limited to the manually created GNPS libraries,  
457 which were based on the same qTOF-MS dataset (GNPS-NIH-NATURALPRODUCTSLIBRARY,  
458 GNPS-NIH-NATURALPRODUCTSLIBRARY\_ROUND2\_POSITIVE, minimum matched signals=3,  
459 minimum cosine similarity=0.6). A new library for both datasets was created with new spectral  
460 entries with at least 2 signals above 0.1% relative intensity and with ion identities matching to  
461 the adduct of the library matches. Furthermore, library matches were filtered by a sample list of  
462 compound names contained in LC-MS samples. The IIMN library creation workflow resulted in  
463 806 and 1,315 new library entries for the qTOF-MS and the Q-Exactive datasets, respectively. The  
464 new library was made publicly available through the GNPS library batch submission  
465 (Supplementary Table 3). In total, we generated 2,659 IIMN-based new spectral library entries.

## 466 **MZmine IIMN workflow for spectral library extraction**

467 To extract spectral library entries from any IIMN results, download the networking results  
468 as a graphml file from a GNPS job page and use the mgf file of that analysis. The special MZmine  
469 IIMN build offers the “GNPS results analysis” module in the tab “Tools” to create library entries  
470 based on these two files and provided metadata. The minimum GNPS library match score sets a  
471 threshold for the extraction of library entries. Furthermore, library matches can be filtered to  
472 also match the ion identity to the adduct of the library match. A simple comparison between the  
473 different reporting formats for adducts was implemented. It removes all spaces, square brackets,  
474 and plus symbols (e.g., harmonizing M+H and [M+H]<sup>+</sup>). Filters are available for new library entries  
475 with a minimum number of signals above a relative intensity threshold.

476 Latest information on the IIMN MS<sup>2</sup> library generation workflow in MZmine is available online:

477 [http://mzmine.github.io/iin\\_fbm](http://mzmine.github.io/iin_fbm)

478 Documentation on the GNPS library batch submission is available at:

479 <https://ccms-ucsd.github.io/GNPSDocumentation/batchupload/>

## 480 **Use case - Compound structure information**

481 The ion identity molecular networking results for the *Stachybotrys chartarum* dataset  
482 (MSV000084134) prove that the ion identity annotations can yield structure relevant  
483 information. Putative molecular formula modifications (+O and +H<sub>2</sub>O) between chemical  
484 compounds can be verified by the maximum number of water losses that were annotated by IIN.  
485 The difference in the number of oxygens in the molecular formulas of phenylspirodrimane  
486 derivatives is reflected in additional losses of H<sub>2</sub>O within the corresponding IINs. The results are  
487 depicted in Supplementary Figure 5. The IIMN job can be accessed on GNPS (rerun of the original  
488 job after additional spectral library entries were added to the GNPS spectral libraries:  
489 <https://gnps.ucsd.edu/ProteoSAFe/status.jsp?task=3bd4def5e0e348c9b113f4a072f03ea9>).

## 490 **Use case - Bile acids**

491 Networks of 88 bile acid extracts from feces and gall bladder of various animals  
492 (MSV000084170) are visualized in Supplementary Figure 4. The comparison between feature-  
493 based molecular networking with and without the additional edges from ion identity networking  
494 demonstrates how IIMN complements and improves FBMN. The new connections between  
495 different ion identities, especially between protonated and sodiated ions, merge multiple  
496 subnetworks and unconnected nodes of specific compound classes into one cluster with a higher  
497 identification density. Nodes with MS<sup>2</sup> spectra that match to reference spectra of free and  
498 conjugated bile acids now fall into the same IIMN network. Finally, the complexity and  
499 redundancy are reduced by collapsing all IINs into corresponding representative nodes. The final  
500 network has a reduced number of nodes and a higher density of edges between nodes with

501 annotations to the same compound classes. The IIMN job can be accessed on GNPS  
502 (<https://gnps.ucsd.edu/ProteoSAFe/status.jsp?task=0a3f4399e5344188805e5856b756d918>).

### 503 **Use case - Implementation of orthogonal supplementary edges**

504 Ion identity molecular networking was the initial driver to implement the option of  
505 supplementary edges into the FBMN workflow on GNPS. However, based on the generic format,  
506 any tool can create and export new relationships between features to link the corresponding  
507 nodes in feature-based molecular networks. As an example, we have implemented a new  
508 MZmine module to annotate neutral mass differences between ion identity networks as putative  
509 chemical modifications, in the format of supplementary edges. These edges connect two IIN if  
510 the neutral mass difference matches a user-defined modifications list.

511 The IIMN MZmine workflow was applied to a dataset of 88 bile acid extracts from feces  
512 and gall bladder of various animals (MSV000084170). IIN modification edges were based on the  
513 mass differences of +methyl (Me, CH<sub>2</sub>), +O, and +H<sub>2</sub>O. To exemplify the results, Supplementary  
514 Figure 6 shows a network cluster of glycocholic acid analogs. Library matching annotated most  
515 of the ion identity networks as glycine conjugated bile acids; Two IINs as glycocholic acid  
516 (+isomers) and two IINs as glycodeoxycholic acid (+isomers) with a mass accuracy of <2 ppm. The  
517 additional modification edges connect these structurally related compounds and increase the  
518 network density. Moreover, they help to infer putative molecular formulas and modified  
519 structures from an FBMN. In a second analysis of the same dataset, IINs were connected based  
520 on mass differences of the modification by taurine, glycine, and alanine conjugation. This  
521 resulted, in additional links between conjugated and free bile acid forms of cholic acid and  
522 deoxycholic acid. The IIMN jobs can be accessed on GNPS.

#### 523 **IIMN**

524 <https://gnps.ucsd.edu/ProteoSAFe/status.jsp?task=0a3f4399e5344188805e5856b756d918>

#### 525 **IIMN: Methyl (Me, CH<sub>2</sub>), O, and H<sub>2</sub>O modification edges**

526 <https://gnps.ucsd.edu/ProteoSAFe/status.jsp?task=465d7285380942a0828e462d1db027c2>

#### 527 **IIMN: Taurine, glycine, and alanine modification edges**

528 <https://gnps.ucsd.edu/ProteoSAFe/status.jsp?task=69b40f808b2047d89fccf3d07e79fc59>

### 529 **Use case - Metal-binding compounds and ionophores**

530 Ion identity molecular networking can be used in combination with native ESI-based  
531 metabolomics<sup>12</sup> to find biologically-relevant metal-binding compounds or to elucidate metal-  
532 binding preferences of known or novel metal-binding molecules (Zhi, H. et al., submitted). One  
533 recent example in which IIMN was instrumental in understanding metal-binding and selectivity  
534 is yersiniabactin. We identified yersiniabactin as a novel zincophore produced by *E. coli* Nissle by  
535 performing post-liquid chromatography (LC) pH adjustment (to pH 6.8) and infusion of zinc  
536 acetate solution, followed by mass spectrometry and ion identity molecular networking. With

537 this strategy, mass spectrometry features with correlated peak shapes and retention times, in  
538 addition to an  $m/z$  difference resulting from zinc-binding ( $+Zn^{2+} -H^+$ ) were found. These results  
539 are summarized in Supplementary Figure 3. While this example highlights the discovery of a zinc-  
540 binding molecule explicitly, IIMN has been used in conjunction with the infusion of other metals,  
541 including iron, copper, and cobalt, to find siderophores and other ionophores. The IIMN job can  
542 be accessed on GNPS  
543 (<https://gnps.ucsd.edu/ProteoSAFe/index.jsp?task=525fd9b6a9f24455a589f2371b1d9540>).

## 544 **Code availability**

545 The IIMN workflow is available as an interface on the GNPS web platform (<https://gnps-quickstart.ucsd.edu/featurebasednetworking>). The workflow code is open source and available  
546 on GitHub ([https://github.com/CCMS-UCSD/GNPS\\_Workflows](https://github.com/CCMS-UCSD/GNPS_Workflows)). It is released under the license  
547 of The Regents of the University of California and free for non-profit research  
548 ([https://github.com/CCMS-UCSD/GNPS\\_Workflows/blob/master/LICENSE](https://github.com/CCMS-UCSD/GNPS_Workflows/blob/master/LICENSE)). The workflow was  
549 written in Python (ver. 3.7) and deployed with the ProteoSAFE workflow manager employed by  
550 GNPS (<http://proteomics.ucsd.edu/Software/ProteoSAFe/>). We also provide documentation,  
551 support, example files, and additional information on the GNPS documentation website  
552 (<https://ccms-ucsd.github.io/GNPSDocumentation/>), and we invite everyone to contribute to the  
553 documentation on GitHub.

555 The source code of all modules which were implemented into MZmine, e.g., the Export  
556 for IIMN module, the metaCorrelate grouping module, the ion identity networking modules, and  
557 the results and spectral library generation module, is available at  
558 [http://mzmine.github.io/iin\\_fbm](http://mzmine.github.io/iin_fbm) under the GNU General Public License. The source code for  
559 the custom GNPS export functions for XCMS is available at [https://github.com/jorainer/xcms-  
560 gnps-tools](https://github.com/jorainer/xcms-gnps-tools) under the GNU General Public License.

## 561 **Data availability**

562 All raw (.raw) and peak picked (.mzXML or .mzML) mass spectrometry data as well as  
563 processed data (.mgf and .csv) and ion identity molecular networks are available through the  
564 MassIVE repository ([massive.ucsd.edu](http://massive.ucsd.edu)). Individual MassIVE dataset identifiers are listed in  
565 Supplementary Table 1. Dataset metadata and MZmine processing parameters are available in  
566 Supplementary Table 5. The statistical results on all 24 datasets are available in Supplementary  
567 File SI\_IIMN\_dataset\_statistics.xlsx. The ion identity statistics on different MS<sup>2</sup> spectral databases  
568 are available as Supplementary File SI\_IIMN\_spectral\_library\_analysis.xlsx.

## 569 **Acknowledgments**

570 We thank the German Chemical Industry Fund (FCI, Fonds der Chemischen Industrie) for  
571 a Ph.D. scholarship and travel support to RS. We thank the Deutsche Forschungsgemeinschaft for  
572 support to DP (PE 2600/1-1) and to SB and KD (BO 1910/20). AB thanks FAPESP fellowship  
573 (2018/24865-4). COG thanks FAPESP scholarship (2019/06061-8). PCD was supported by the  
574 Gordon and Betty Moore Foundation (GBMF7622), the US National Institutes of Health for the  
575 Center (P41 GM103484, R03 CA211211, R01 GM107550). LFN was supported by the US National  
576 Institutes of Health (R01 GM107550), and the European Union's Horizon 2020 program (MSCA-  
577 GF, 704786). AMCR and PCD were supported by the National Sciences Foundation grant IOS-  
578 1656481. LIA was supported by the National Science Foundation grant OCE-1736656. MR is  
579 supported by Public Health Service Grants AI126277, AI114625, AI145325, by the Chiba  
580 University-UCSD Center for Mucosal Immunology, Allergy, and Vaccines and an Investigator in  
581 the Pathogenesis of Infectious Disease Award from the Burroughs Wellcome Fund. DP, MAP and  
582 KIP were supported by the National Science Foundation's Center for Aerosol Impacts on the  
583 Chemistry of the Environment (CAICE) under grant number CHE1801971. KLM was supported by  
584 the Gordon and Betty Moore Foundation (GBMF6920) and the US National Institutes of Health  
585 (R01 GM132649). RT was supported by the US National Institutes of Health (NCCIH  
586 T32AT010131). AAO acknowledges the support of Fulbright Commission and Consejo Nacional  
587 de Investigaciones Científicas y Técnicas (CONICET-Argentina). ZK was supported by the program  
588 Lumina Quaeruntur of the Czech Acad Sci. ALG was supported by Vaincre la mucoviscidose and  
589 Association Grégory Lemarchal. HMR thanks CNPq (#142014/2018-4), and the Brazilian Fulbright  
590 Commission for the scholarships provided. We thank Ajit Jadhav (NIH/NCATS) for providing the  
591 compounds used for the adduct induction experiment, and for the library generation. We thank  
592 Andreas J Andersson, Heather N Page, Travis A Courtney, Evan Fox, Sara P. Pucket, Kathleen E.  
593 Kyle, Jonathan L. Klassen and Marcy J. Balunas, Andrea Fidgett and Michelle Gaffney for providing  
594 samples and assisting during sampling campaigns.

## 595 **Competing interest**

596 MW is the founder of Ometa Labs LLC. AA is a consultant for Ometa Labs LLC. SB and KD are  
597 co-founders of Bright Giant GmbH. AK is an employee of Bruker Daltonics GmbH.



## 598 References

- 599 1. Watrous, J. *et al.* Mass spectral molecular networking of living microbial colonies. *Proc.*  
600 *Natl. Acad. Sci. U. S. A.* **109**, E1743–52 (2012).
- 601 2. Wang, M. *et al.* Sharing and community curation of mass spectrometry data with Global  
602 Natural Products Social Molecular Networking. *Nat. Biotechnol.* **34**, 828–837 (2016).
- 603 3. Quinn, R. A. *et al.* Molecular Networking As a Drug Discovery, Drug Metabolism, and  
604 Precision Medicine Strategy. *Trends Pharmacol. Sci.* **38**, 143–154 (2017).
- 605 4. Fox Ramos, A. E., Evanno, L., Poupon, E., Champy, P. & Beniddir, M. A. Natural products  
606 targeting strategies involving molecular networking: different manners, one goal. *Nat.*  
607 *Prod. Rep.* **36**, 960–980 (2019).
- 608 5. da Silva, R. R. *et al.* Propagating annotations of molecular networks using in silico  
609 fragmentation. *PLoS Comput. Biol.* **14**, e1006089 (2018).
- 610 6. Nothias, L. F. *et al.* Feature-based Molecular Networking in the GNPS Analysis  
611 Environment. *bioRxiv* 812404 (2019) doi:10.1101/812404.
- 612 7. Kuhl, C., Tautenhahn, R., Böttcher, C., Larson, T. R. & Neumann, S. CAMERA: an integrated  
613 strategy for compound spectra extraction and annotation of liquid chromatography/mass  
614 spectrometry data sets. *Anal. Chem.* **84**, 283–289 (2012).
- 615 8. Broeckling, C. D., Afsar, F. A., Neumann, S., Ben-Hur, A. & Prenni, J. E. RAMClust: A Novel  
616 Feature Clustering Method Enables Spectral-Matching-Based Annotation for Metabolomics  
617 Data. *Anal. Chem.* (2014) doi:10.1021/ac501530d.
- 618 9. Morreel, K. *et al.* Systematic structural characterization of metabolites in Arabidopsis via  
619 candidate substrate-product pair networks. *Plant Cell* **26**, 929–945 (2014).
- 620 10. Mahieu, N. G., Spalding, J. L., Gelman, S. J. & Patti, G. J. Defining and Detecting Complex  
621 Peak Relationships in Mass Spectral Data: The Mz.unity Algorithm. *Anal. Chem.* **88**, 9037–  
622 9046 (2016).
- 623 11. DeFelice, B. C. *et al.* Mass Spectral Feature List Optimizer (MS-FLO): A Tool To Minimize  
624 False Positive Peak Reports in Untargeted Liquid Chromatography-Mass Spectroscopy (LC-  
625 MS) Data Processing. *Anal. Chem.* **89**, 3250–3255 (2017).
- 626 12. Aron, A. *et al.* Native Electrospray-based Metabolomics Enables the Detection of Metal-  
627 binding Compounds. doi:10.1101/824888.
- 628 13. Frei, A. *et al.* Metal complexes as a promising source for new antibiotics. *Chem. Sci.* **11**,  
629 2627–2639 (2020).
- 630 14. Dührkop, K. *et al.* SIRIUS 4: a rapid tool for turning tandem mass spectra into metabolite  
631 structure information. *Nat. Methods* **16**, 299–302 (2019).
- 632 15. Dührkop, K. *et al.* Classes for the masses: Systematic classification of unknowns using  
633 fragmentation spectra. *bioRxiv* 2020.04.17.046672 (2020) doi:10.1101/2020.04.17.046672.
- 634 16. Fraisier-Vannier, O., Chervin, J. & Cabanac, G. MS-CleanR: A feature-filtering approach to  
635 improve annotation rate in untargeted LC-MS based metabolomics. *bioRxiv* (2020).
- 636 17. Pluskal, T., Castillo, S., Villar-Briones, A. & Oresic, M. MZmine 2: modular framework for  
637 processing, visualizing, and analyzing mass spectrometry-based molecular profile data.

- 638 *BMC Bioinformatics* **11**, 395 (2010).
- 639 18. Tsugawa, H. *et al.* A cheminformatics approach to characterize metabolomes in stable-  
640 isotope-labeled organisms. *Nat. Methods* **16**, 295–298 (2019).
- 641 19. Smith, C. A., Want, E. J., O’Maille, G., Abagyan, R. & Siuzdak, G. XCMS: processing mass  
642 spectrometry data for metabolite profiling using nonlinear peak alignment, matching, and  
643 identification. *Anal. Chem.* **78**, 779–787 (2006).
- 644 20. Shannon, P. *et al.* Cytoscape: a software environment for integrated models of  
645 biomolecular interaction networks. *Genome Res.* **13**, 2498–2504 (2003).
- 646 21. Gentleman, R. C. *et al.* Bioconductor: open software development for computational  
647 biology and bioinformatics. *Genome Biol.* **5**, R80 (2004).
- 648 22. Treutler, H. & Neumann, S. Prediction, Detection, and Validation of Isotope Clusters in  
649 Mass Spectrometry Data. *Metabolites* **6**, (2016).
- 650 23. Senan, O. *et al.* CliqueMS: a computational tool for annotating in-source metabolite ions  
651 from LC-MS untargeted metabolomics data based on a coelution similarity network.  
652 *Bioinformatics* **35**, 4089–4097 (2019).
- 653 24. Tsugawa, H. *et al.* MS-DIAL: data-independent MS/MS deconvolution for comprehensive  
654 metabolome analysis. *Nat. Methods* **12**, 523–526 (2015).
- 655 25. Horai, H. *et al.* MassBank: a public repository for sharing mass spectral data for life  
656 sciences. *J. Mass Spectrom.* **45**, 703–714 (2010).
- 657 26. Vargas, F. *et al.* Protocol for Community-created Public MS/MS Reference Library Within  
658 the GNPS Infrastructure. *bioRxiv* 804401 (2019) doi:10.1101/804401.
- 659 27. Jagels, A. *et al.* Exploring Secondary Metabolite Profiles of *Stachybotrys* spp. by LC-MS/MS.  
660 *Toxins* **11**, (2019).
